# Supplementary material for: Unlearning the boundary-crossing constraint: processing instruction and the acquisition of motion event construal
Source: publisher site journal article supplement (doi:10.1515/iral-2020-0147), 2021-03-10
Supplement: Supplementary file 1 [file j_iral-2020-0147_suppl_002.docx]

**Appendix B: Robot Stories 1 and 2**

**Robot Story Stimulus Material – Story 1**


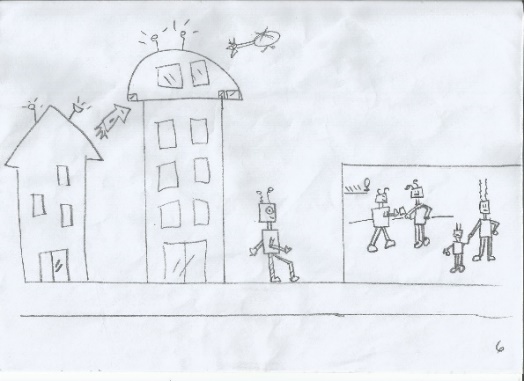


| 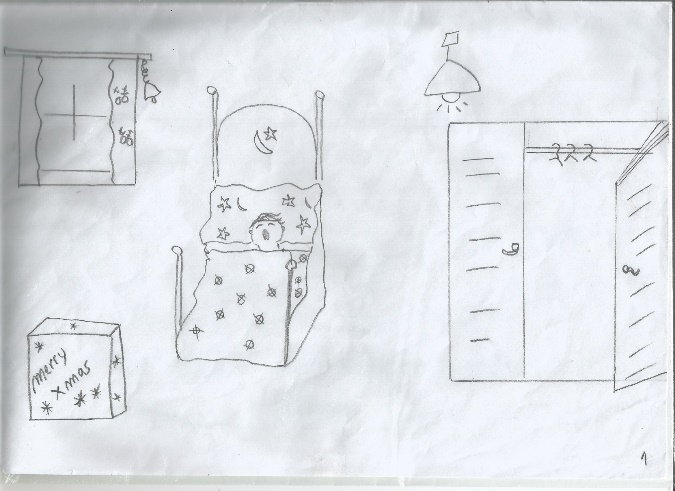 | 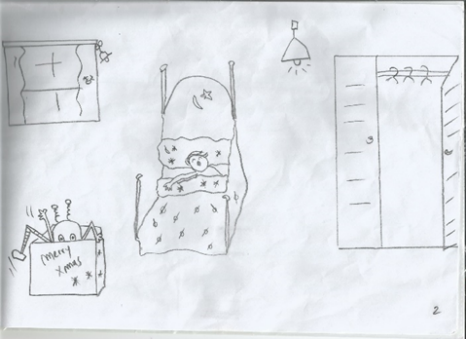 |
| --- | --- |
| 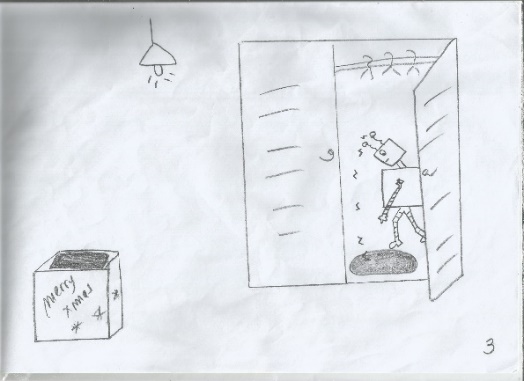 | 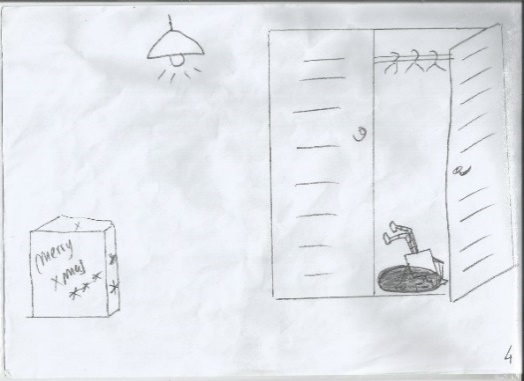 |
| 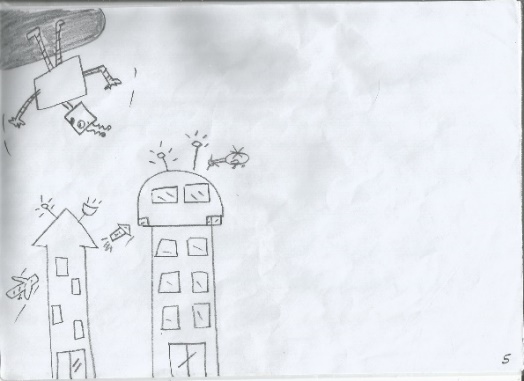 |  |
| 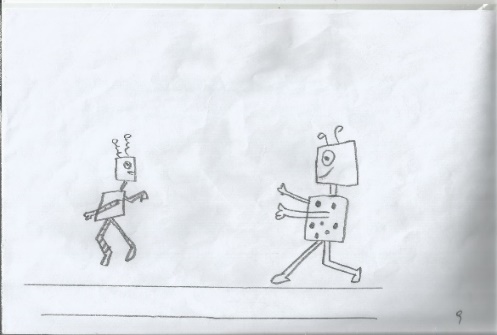 | 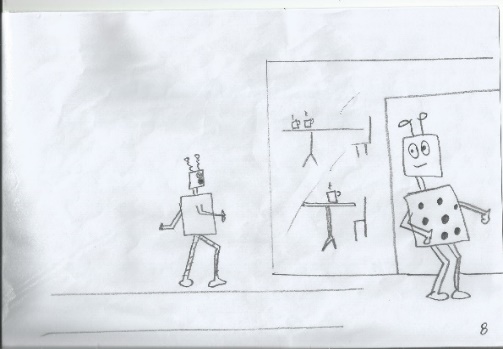 |

| 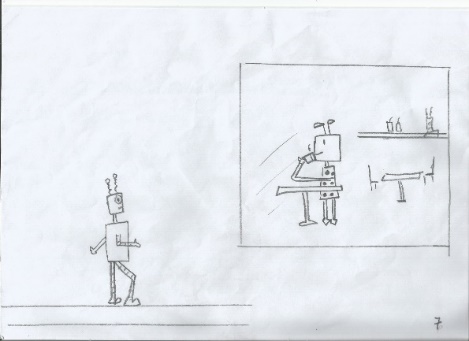 | 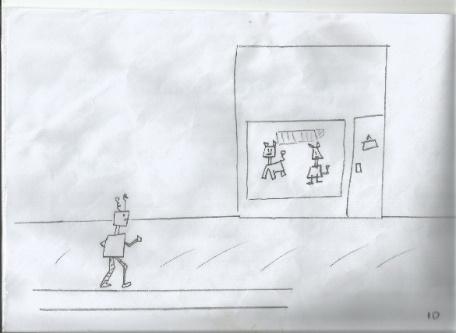 |
| --- | --- |
| 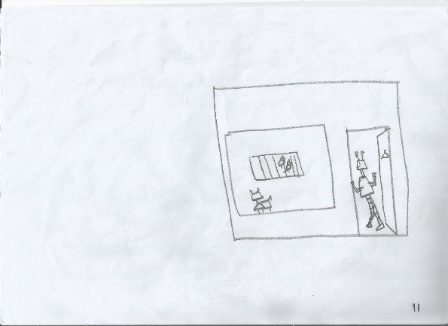 | 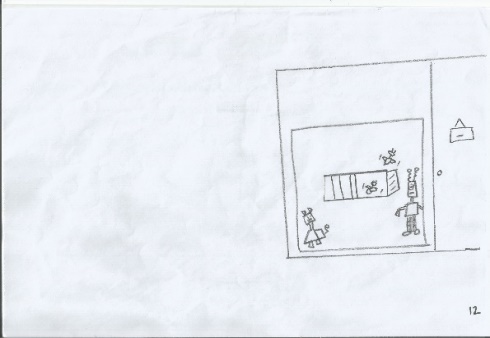 |
| 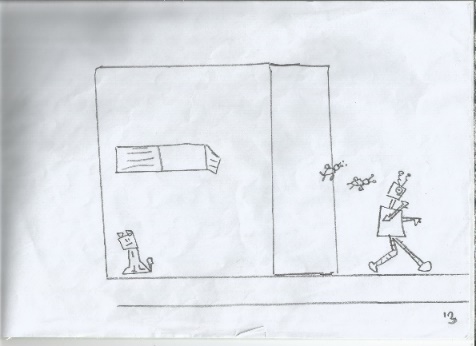 | 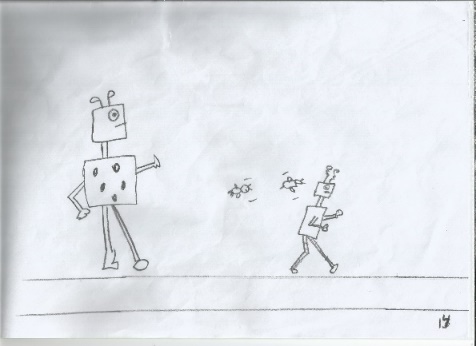 |
| 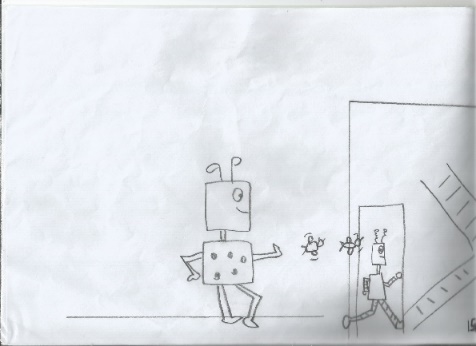 | 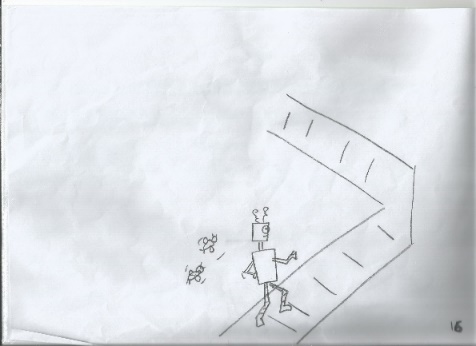 |

| 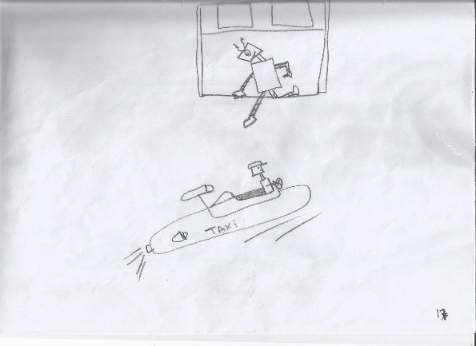 | 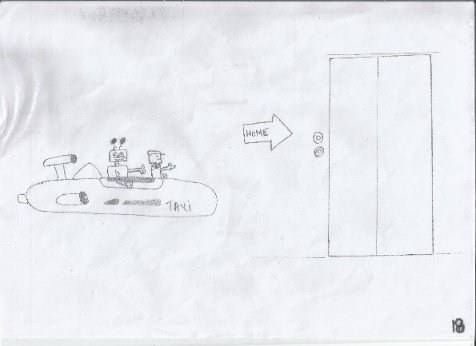 |
| --- | --- |
| 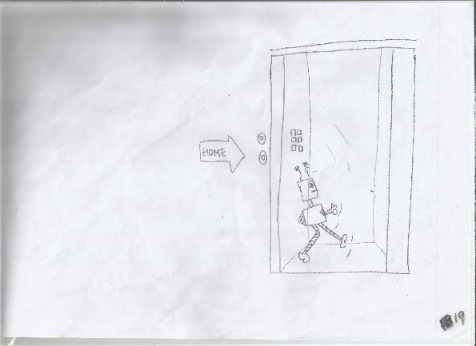 | 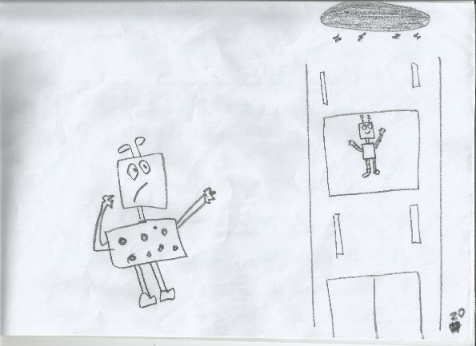 |
| 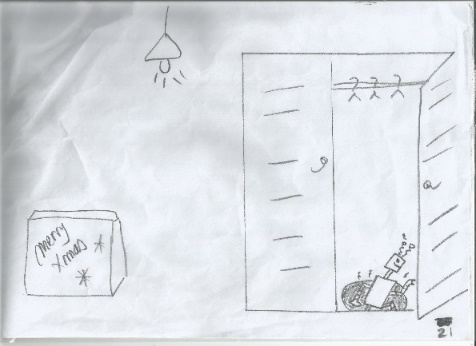 | 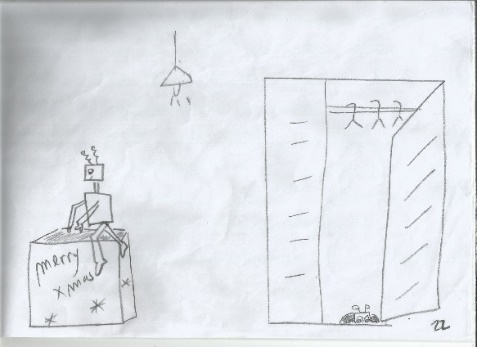 |
| 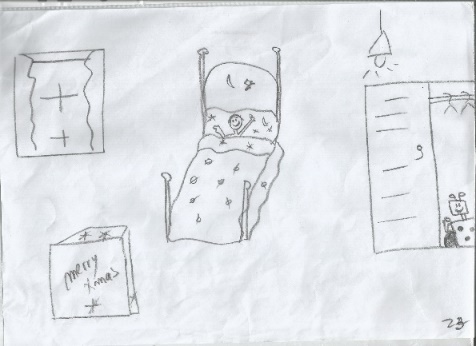 | **The end** |

**Robot Story Stimulus Material – Story 2**

| 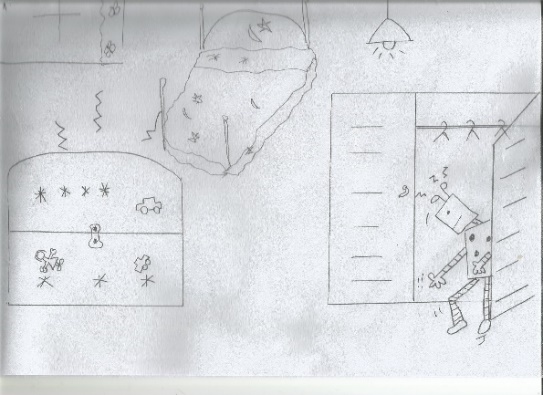 | 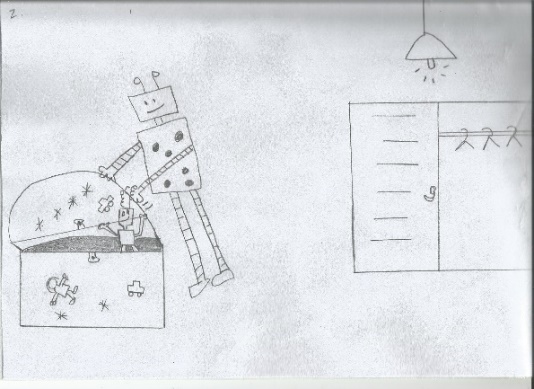 |
| --- | --- |
| 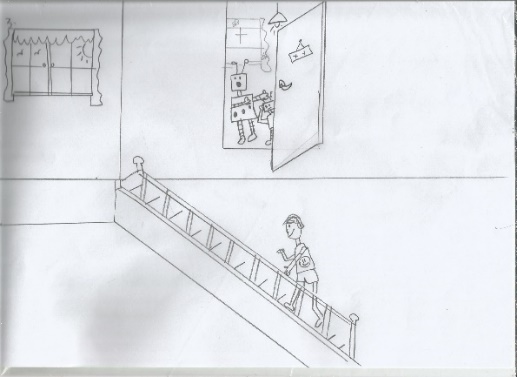 | 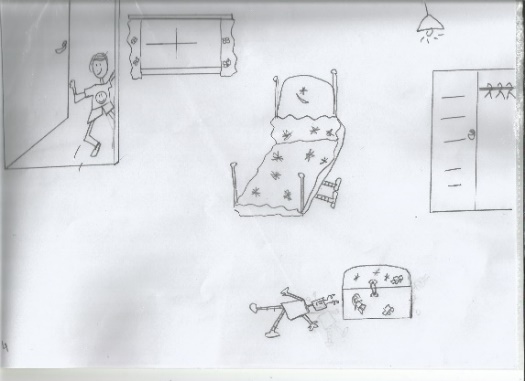 |
| 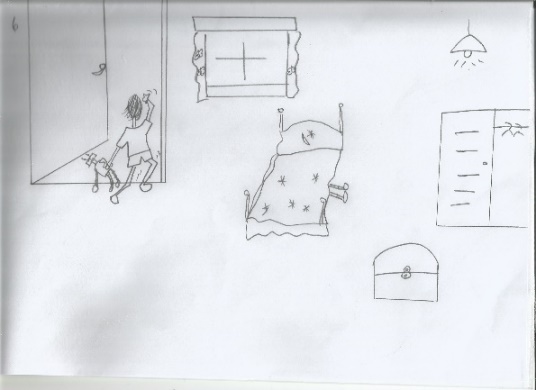 | 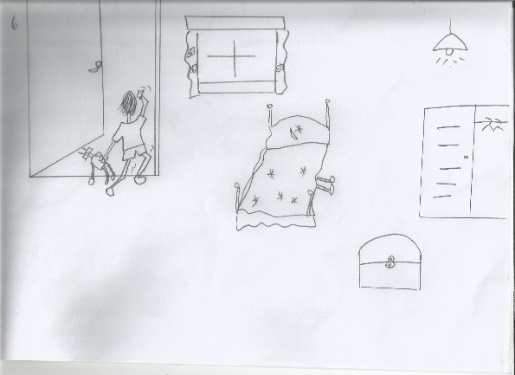 |
| 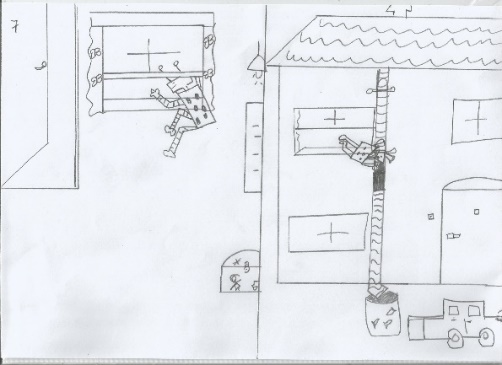 | 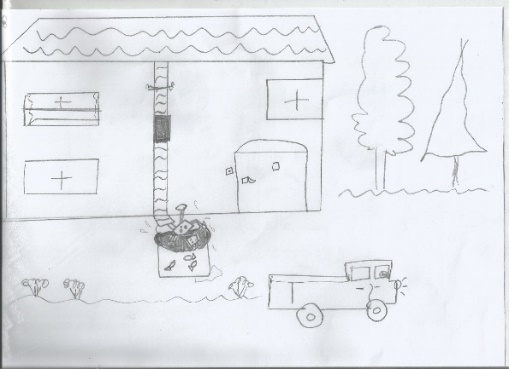 |

| 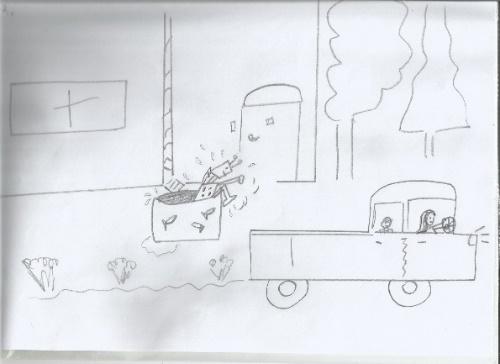 | 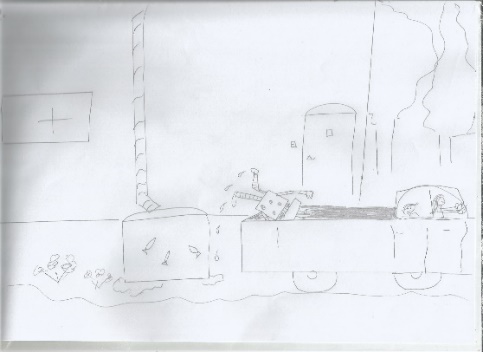 |
| --- | --- |
| 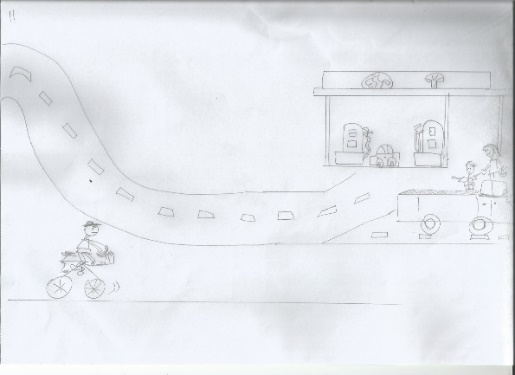 | 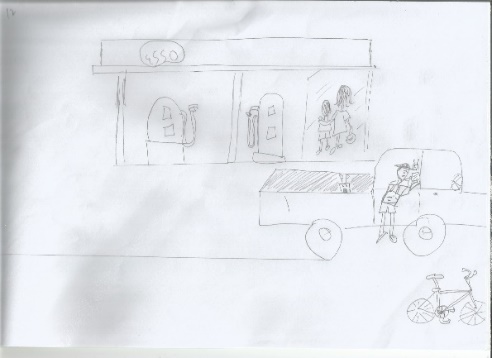 |
| 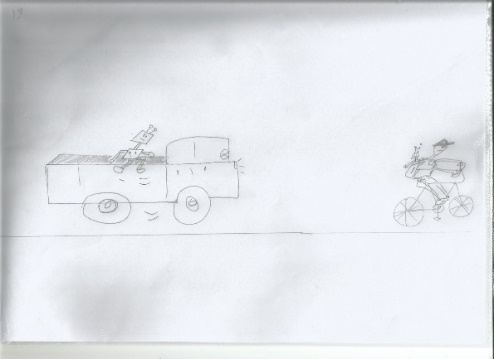 | 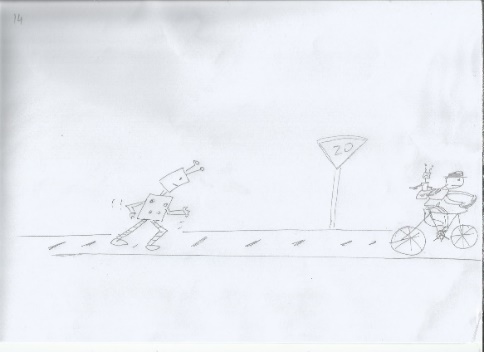 |
| 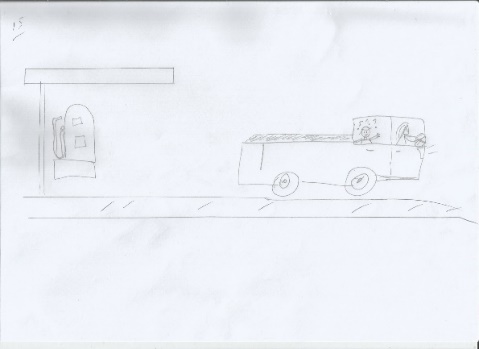 | 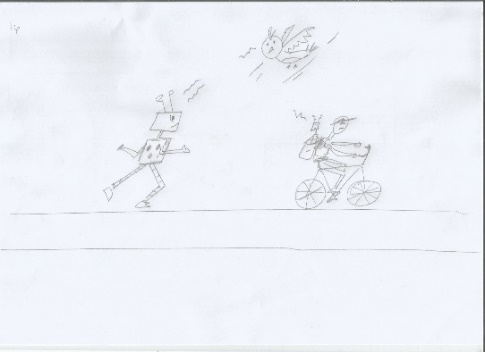 |

| 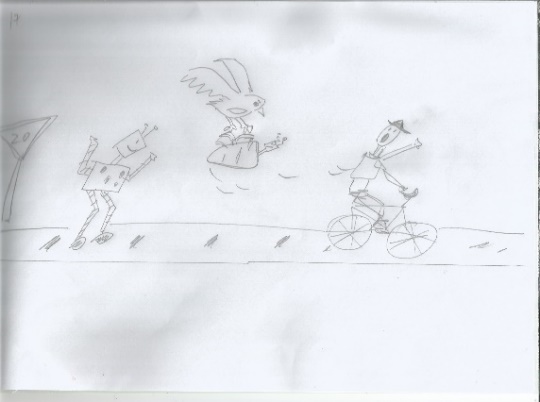 | 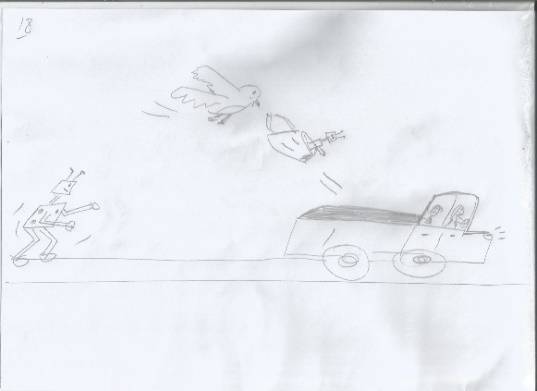 |
| --- | --- |
| 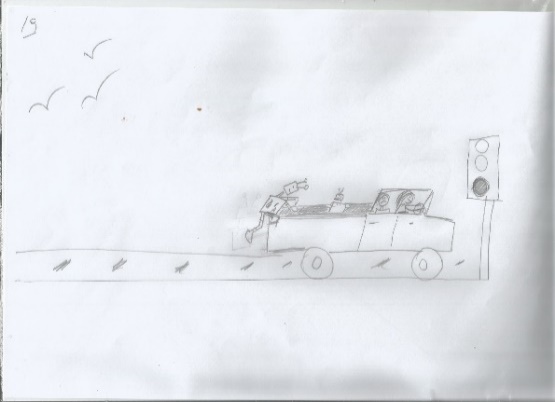 | 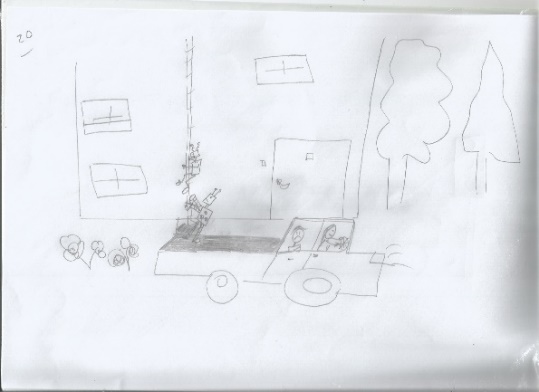 |
| 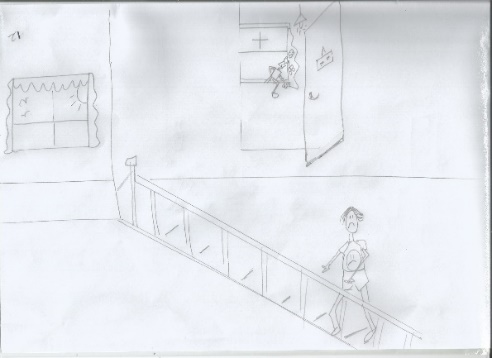 | 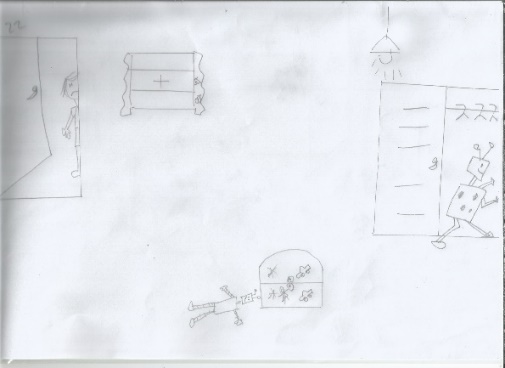 |
| 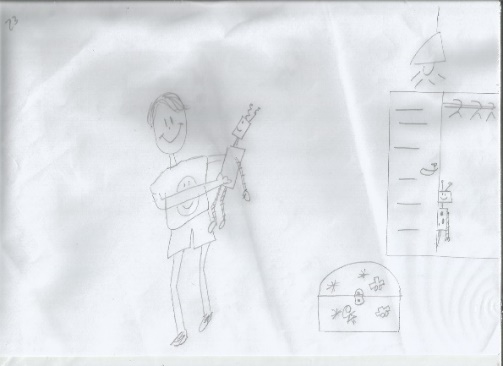 | **The end** |
