# Supplementary material for: Unlearning the boundary-crossing constraint: processing instruction and the acquisition of motion event construal
Source: publisher site journal article supplement (doi:10.1515/iral-2020-0147), 2021-03-10
Supplement: Supplementary file 2 [file j_iral-2020-0147_suppl_003.docx]

**Appendix C: List of verbs used to describe motion events** (main verbs are underlined)

| **Path+BC** |
| --- |
| come in/into/out of, disappear into, drop into, enter, escape through, exit, fall in/into, follow someone out/through, get in/inside/into/off/on/out of, go inside/into/out/ out of/through, head into, leave the room/through, pass through, turn back into. |
|  |
| **Path-BC** |
| advance, approach, arrive, ascend/ towards, catch up (with), chase, come back to/close to/from/near /to/up, depart, descend, elevate, escape, fall down/over, find one’s way, follow, get away from/closer/home, go back/down/downstairs/home/next to/to/upstairs/towards/ upwards, head back/to/towards, land on, leave, makes one’s way, move away/towards/up, near, pass (by), proceed, reach, return, rise, tag along, take the stairs, turn back to. |
|  |
| **Manner+BC** |
| climb into/out of/through, crawl into/out of, dash into, dive headfirst into, drive into, fly inside/into/out of, hop out of, jump in/inside/into/off/out of/under, leap in, lurch out of, plunge into, pop in/out of, run in/into/out of/under, rush into/out of/outside, scramble out of, sneak into, splash into, step into, walk into/inside/out of. |
|  |
| **Manner-BC** |
| climb along, down/the stairs/to/up/upstairs, cycle away, dash by, drive along/away/back/ forward/off/to, float by, fly above/after/around/back/behind/by/off/over/past/to/towards/up, jump forward/from, ride back/off/towards, roam around, run after/along/away/back to/behind /to/towards/up/upstairs, rush over to/to/towards, slide along, down, over, step up, stroll around, swoop down, walk across/along/around/away/back to/closer/down/on the stairs /to/towards/up/upstairs, wander around. |
