# Supplementary material for: Unlearning the boundary-crossing constraint: processing instruction and the acquisition of motion event construal
Source: publisher site journal article supplement (doi:10.1515/iral-2020-0147), 2021-03-10
Supplement: Supplementary file 3 [file j_iral-2020-0147_suppl_004.docx]

**Appendix D:** Lesson Plans

**Table D1** Path Lesson 1

|  | **EI: 5 mins** | **SI: 15 mins** | **SI: 25 mins** |
| --- | --- | --- | --- |
| **IG** | Brief explanation of typological differences. | Listen twice to a sentence and choose correct picture | 1. Read sentence and choose correct picture.  2. Affective activities (personal judgement task). |
| **IOG** | Brief explanation of typological differences. | Listen twice to a story (parts 1 and 2) and write answers using target forms. | 1. Read story (parts 3 to 5) and write answers using target forms.  2. Recall story using target forms |

**Table D2** Path Lesson 2

|  | **EI: 5 mins** | **SI: 15 mins** | **SI: 25 mins** |
| --- | --- | --- | --- |
| **IG** | Brief review of typological differences. | Listen twice to a story (parts 1 and 2) and answer True or False. | 1. Read story (parts 3 to 5) and answer True or False.  2. Affective activities? (Give opinion about story) |
| **IOG** | Brief review of typological differences. | Listen twice to a story (parts 1 and 2) and write answers using target forms. | 1. Read story (parts 3 to 5) and write answers using target forms.  2. Written summary of story using target forms |

**Table D3** Manner Lesson 1

|  | **EI: 5 mins** | **SI: 15 mins** | **SI: 25 mins** |
| --- | --- | --- | --- |
| **IG** | Brief explanation of manner + motion. | Listen twice to a sentence and choose picture | 1. Read and choose the right pictures  2. Affective activities (personal judgement task). |
| **IOG** | Brief explanation of manner + motion. | Listen twice to a sentence and choose picture | 1. Complete the sentence below the picture.  2. Sentence completion and personal experiences |

**Table D4** Manner Lesson 2

|  | **EI: 5 mins** | **SI: 15 mins** | **SI: 25 mins** |
| --- | --- | --- | --- |
| **IG** | Brief review of manner + motion | Listen twice to a story (parts 1 and 2) and answer True or False | 1. Read story (parts 3 to 5) and answer True or False.  2. Affective activities (personal judgement task). |
| **IOG** | Brief review of manner + motion. | Listen twice to a story (parts 1 and 2) and answer True or False | 1. Complete the sentence below the picture.  2. Sentence completion and personal experiences |
