# Supplementary material for: Unlearning the boundary-crossing constraint: processing instruction and the acquisition of motion event construal
Source: publisher site journal article supplement (doi:10.1515/iral-2020-0147), 2021-03-10
Supplement: Supplementary file 4 [file j_iral-2020-0147_suppl_005.docx]

**Appendix E:** Mean percentages (and standard deviations) of Manner +BC expressions produced by treatment and language type across test times

|  |  | **Manner +BC expressions** | | |
| --- | --- | --- | --- | --- |
| **Treatment** | **L1** | **PT** | **IPT** | **DPT** |
| **IG:** N=29 | **S-Framed:** N=4 | 44.23  (21.04) | 78.25  (6.50) | 82.45  (12.43) |
| **V-Framed:** N=22 | 22.63  (21.09) | 69.31  (12.37) | 64.33  (16.56) |
| **E-Framed:** N=3 | 32.12  (10.65) | 63.81  (18.64) | 70.88  (18.61) |
|  |  |  |  |  |
| **IOG:** N=30 | **S-Framed:** N=5 | 39.38  (14.94) | 67.55  (17.65) | 34.48  (19.57) |
| **V-Framed:** N=23 | 21.74  (9.75) | 62.08  (17.81) | 55.26  (20.42) |
| **E-Framed:** N=2 | 42.50  (24.75) | 57.14  (10.10) | 57.92  (6.48) |
|  |  |  |  |  |
| **IE:** N=24 | **S-Framed:** N=1 | 46.67  (-) | 50.00  (-) | 50.00  (-) |
| **V-Framed:** N=15 | 26.66  (16.42) | 32.00  (17.84) | 28.85  (19.05) |
| **E-Framed:** N=8 | 39.48  (25.18) | 52.74  (20.57) | 47.67  (28.70) |
